# Supplementary material for: Changes in Perceptions of Discrimination in Health Care in California, 2003 to 2017
Source: PubMed Central journal article supplement (PMC6613287; doi:10.1001/jamanetworkopen.2019.6665), 2019-07-03
Supplement: jamanetwopen-2-e196665-s001.pdf [file jamanetwopen-2-e196665-s001.pdf]

## Supplementary Online Content

Schulson LB, Paasche-Orlow MK, Xuan Z, Fernandez A. Changes in perceptions of discrimination in health care in California, 2003 to 2017. *JAMA Netw Open*. 2019;2(7):e196665. doi:10.1001/jamanetworkopen.2019.6665

**eTable 1.** Perceived Recent Discrimination in Healthcare Among Those With Fair to Poor Health in 2015-2017 vs. 2003-2005 Controlling for Demographic Covariates

**eTable 2.** Adjusted Results of Predictors of Recent Discrimination in Healthcare in 2003-2005 and 2015-2017

**eTable 3.** Perceived Recent Discrimination in Healthcare in 2015 vs. 2017 Controlling for Demographic Covariates

This supplementary material has been provided by the authors to give readers additional information about their work.

| <b>eTable 1: Perceived Recent Discrimination in Healthcare among those with Fair to Poor Health in 2015-2017 vs. 2003-2005 controlling for Demographic Covariates</b> |                                |               |                |
|-----------------------------------------------------------------------------------------------------------------------------------------------------------------------|--------------------------------|---------------|----------------|
|                                                                                                                                                                       | <b>Adjusted OR<sup>a</sup></b> | <b>95% CI</b> | <b>p-value</b> |
| <b>Model 1<sup>b</sup></b>                                                                                                                                            |                                |               |                |
| Overall                                                                                                                                                               | 0.60                           | 0.50, 0.73    | <.0001         |
| <b>Model 2: Race by Time Period Interaction Term<sup>c</sup></b>                                                                                                      |                                |               |                |
| African-American                                                                                                                                                      | 0.94                           | 0.34, 2.64    | 0.91           |
| Asian                                                                                                                                                                 | 0.87                           | 0.41, 1.86    | 0.72           |
| Latino                                                                                                                                                                | 0.37                           | 0.023, 0.67   | .0007          |
| Other                                                                                                                                                                 | 1.46                           | 0.63, 3.35    | 0.37           |

<sup>a</sup> Probability of recent discrimination in health care in late years compared to early years, with early years as reference.

<sup>b</sup> Model 1 includes race, sex, age, education, poverty level, insurance status, general health, usual source of care, and LEP

<sup>c</sup> Model 2 includes sex, age, education, poverty level, insurance status, general health, usual source of care, and LEP. Race is included in the model as an interaction term. White is referent.

| <b>eTable 2: Adjusted Results of Predictors of Recent Discrimination in Healthcare in 2003-2005 and 2015-2017</b> |                                |               |                |                                |               |                |
|-------------------------------------------------------------------------------------------------------------------|--------------------------------|---------------|----------------|--------------------------------|---------------|----------------|
|                                                                                                                   | <b>2003-2005</b>               |               |                | <b>2015-2017</b>               |               |                |
|                                                                                                                   | <b>Adjusted OR<sup>a</sup></b> | <b>95% CI</b> | <b>p-value</b> | <b>Adjusted OR<sup>a</sup></b> | <b>95% CI</b> | <b>p-value</b> |
| Latino <sup>b</sup>                                                                                               | 2.66                           | 2.34, 3.03    | <.0001         | 1.96                           | 1.27, 3.03    | .0025          |
| Asian <sup>b</sup>                                                                                                | 2.41                           | 2.04, 2.85    | <.0001         | 1.89                           | 1.24, 2.88    | .0030          |
| African-American <sup>b</sup>                                                                                     | 4.01                           | 3.43, 4.68    | <.0001         | 4.50                           | 2.75, 7.40    | <.0001         |
| Other                                                                                                             | 2.15                           | 1.77, 2.62    | <.0001         | 3.02                           | 1.97, 4.62    | <.0001         |
| LEP <sup>c</sup>                                                                                                  | 1.11                           | 0.96, 1.29    | 0.1741         | 1.14                           | 0.76, 1.75    | 0.55           |
| Immigrant                                                                                                         | 1.53                           | 1.37, 1.71    | <.0001         | 1.20                           | 0.84, 1.70    | 0.32           |
| Male Sex                                                                                                          | 1.03                           | 0.95, 1.11    | 0.5321         | 1.29                           | 0.97, 1.72    | 0.08           |
| 0-99% poverty <sup>d</sup>                                                                                        | 2.10                           | 1.80, 2.45    | <.0001         | 1.83                           | 1.21, 2.76    | .0044          |
| Less than high school education <sup>e</sup>                                                                      | 0.89                           | 0.71, 1.14    | 0.1651         | 0.69                           | 0.38, 1.28    | 0.24           |
| Poor Health <sup>f</sup>                                                                                          | 2.62                           | 2.13, 3.22    | <.0001         | 2.82                           | 1.61, 4.90    | .0002          |
| Uninsured <sup>g</sup>                                                                                            | 1.35                           | 1.20, 1.53    | <.0001         | 1.25                           | 0.88, 1.77    | 0.22           |
| Medicaid <sup>g</sup>                                                                                             | 1.12                           | 0.98, 1.28    | 0.1022         | 1.71                           | 1.24, 2.40    | .0011          |
| Community Health Center <sup>h</sup>                                                                              | 1.28                           | 1.13, 1.46    | 0.0002         | 1.09                           | 0.83, 1.44    | 0.52           |

|                                                    |      |            |        |      |            |      |
|----------------------------------------------------|------|------------|--------|------|------------|------|
| Emergency department/ Urgent care <sup>h</sup>     | 1.27 | 0.98, 1.64 | 0.07   | 1.60 | 0.98, 2.64 | 0.06 |
| Some other place/ no particular place <sup>h</sup> | 2.94 | 2.09, 4.14 | <.0001 | 1.51 | 0.66, 3.46 | 0.33 |
| No usual source of care <sup>h</sup>               | 1.29 | 1.11, 1.50 | .0008  | 1.05 | 0.75, 1.47 | 0.78 |

<sup>a</sup> Probability of recent discrimination in health care controlling for race/ethnicity, LEP status, sex, poverty level, education, health status, insurance type, usual source of race, and age. In models where immigration status is included, LEP status was excluded due to collinearity.

<sup>b</sup> White as referent

<sup>c</sup> Limited English Proficiency

<sup>d</sup> > 300% poverty level as referent

<sup>e</sup> College graduate as referent

<sup>f</sup> Excellent health as referent

<sup>g</sup> Commercial insurance as referent

<sup>h</sup> Doctor's office as referent

| <b>eTable 3: Perceived Recent Discrimination in Healthcare in 2015 vs. 2017 Controlling for Demographic Covariates</b> |                                |               |                |
|------------------------------------------------------------------------------------------------------------------------|--------------------------------|---------------|----------------|
|                                                                                                                        | <b>Adjusted OR<sup>a</sup></b> | <b>95% CI</b> | <b>p-value</b> |
| <b>Model 1<sup>b</sup></b>                                                                                             |                                |               |                |
| Overall                                                                                                                | 1.06                           | 0.82, 1.36    | 0.67           |
| <b>Model 2: Race by Time Period Interaction Term<sup>c</sup></b>                                                       |                                |               |                |
| African-American                                                                                                       | 1.18                           | 0.31, 4.46    | 0.81           |
| Asian                                                                                                                  | 1.43                           | 0.59, 3.48    | 0.26           |
| Latino                                                                                                                 | 1.15                           | 0.45, 2.92    | 0.77           |
| Other                                                                                                                  | 1.65                           | 0.68, 3.97    | 0.26           |
| <b>Model 3: Immigrant by Time Period Interaction Term<sup>d</sup></b>                                                  |                                |               |                |
| Immigrant by Year Interaction Term                                                                                     | 0.97                           | 0.59, 1.59    | 0.91           |
| <b>Model 4: LEP<sup>e</sup> by Time Period Interaction Term<sup>f</sup></b>                                            |                                |               |                |
| LEP <sup>e</sup> by Year Interaction Term                                                                              | 1.01                           | 0.60, 1.71    | 0.96           |

<sup>a</sup> Probability of recent discrimination in health care in 2015 compared to 2017, with 2015 as reference.

<sup>b</sup> Model 1 includes race, sex, age, education, poverty level, insurance status, general health, usual source of care, and LEP

<sup>c</sup> Model 2 includes sex, age, education, poverty level, insurance status, general health, usual source of care, and LEP. Race is included in the model as an interaction term. White is referent.

<sup>d</sup> Model 3 includes race, sex, age, education, poverty level, insurance status, general health, usual source of care, and time in the USA. Immigrant is an interaction term with non-immigrant as referent.

<sup>e</sup> Limited English Proficiency

<sup>f</sup> Model 4 includes race, sex, age, education, poverty level, insurance status, general health, usual source of care, and time in the USA. LEP is an interaction term with English speaking as referent.
